# Supplementary material for: Correcting for model changes in statistical postprocessing – an approach based on response theory
Source: Copernicus journal article supplement (doi:10.5194/npg-27-307-2020), 2020-05-27
Supplement: Supplementary file 2 [file npg-27-307-2020-supplement.zip]

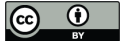

*Supplement of*

**Correcting for model changes in statistical postprocessing –  
an approach based on response theory**

**Jonathan Demaeyer and Stéphane Vannitsem**

*Correspondence to:* Jonathan Demaeyer ([jodemaey@meteo.be](mailto:jodemaey@meteo.be))

- [npg-27-307-2020-supplement-title-page.pdf](#)
- [supplementary\\_material\\_1.pdf](#)
- [supplementary\\_material\\_2.pdf](#)

The copyright of individual parts of the supplement might differ from the CC BY 4.0 License.
